# Supplementary material for: Detection of vancomycin resistances in enterococci within 3 ½ hours
Source: PubMed Central journal article supplement — Sci Rep. 2015 Feb 3;5:8217. doi: 10.1038/srep08217 (PMC4314646; doi:10.1038/srep08217), 2015-02-03
Supplement: srep08217-s1.pdf [file srep08217-s1.pdf]

## Supplementary information

### Detection of vancomycin resistances in enterococci within 3 ½ hours

*U.-Ch. Schröder<sup>#,1,2</sup> C. Beleites<sup>#,1</sup> C. Assmann,<sup>2</sup> U. Glaser,<sup>1,2</sup> U. Hübner,<sup>1</sup> W. Pfister,<sup>3</sup> W. Fritzsche,<sup>1</sup> J. Popp,<sup>1,2,4</sup> U. Neugebauer<sup>1,2\*</sup>*

<sup>1</sup> *Leibniz Institute of Photonic Technology (IPHT), Jena, Germany*

<sup>2</sup> *Center for Sepsis Control and Care (CSCC), Jena University Hospital, Germany*

<sup>3</sup> *Institute of Medical Microbiology, Jena University Hospital, Germany*

<sup>4</sup> *Institute of Physical Chemistry and Abbe Center of Photonics, University Jena, Germany*

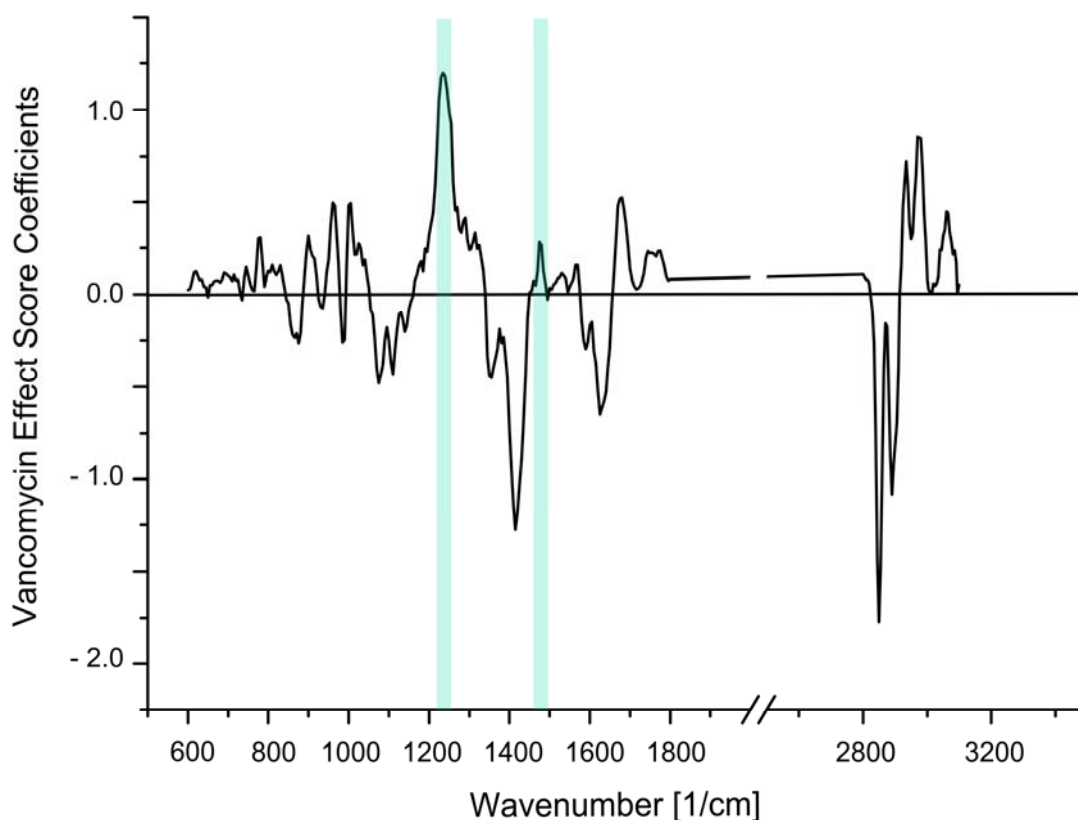

**Supplementary Figure S1: Vancomycin effect score coefficients of the model.** | The transformation coefficients of PLS and LDA leading to the vancomycin effect scores reveal the differences in the spectra the model is using for its choice of the linear discriminants. The two highlighted regions correspond to the differences discussed in the Raman mean spectra.



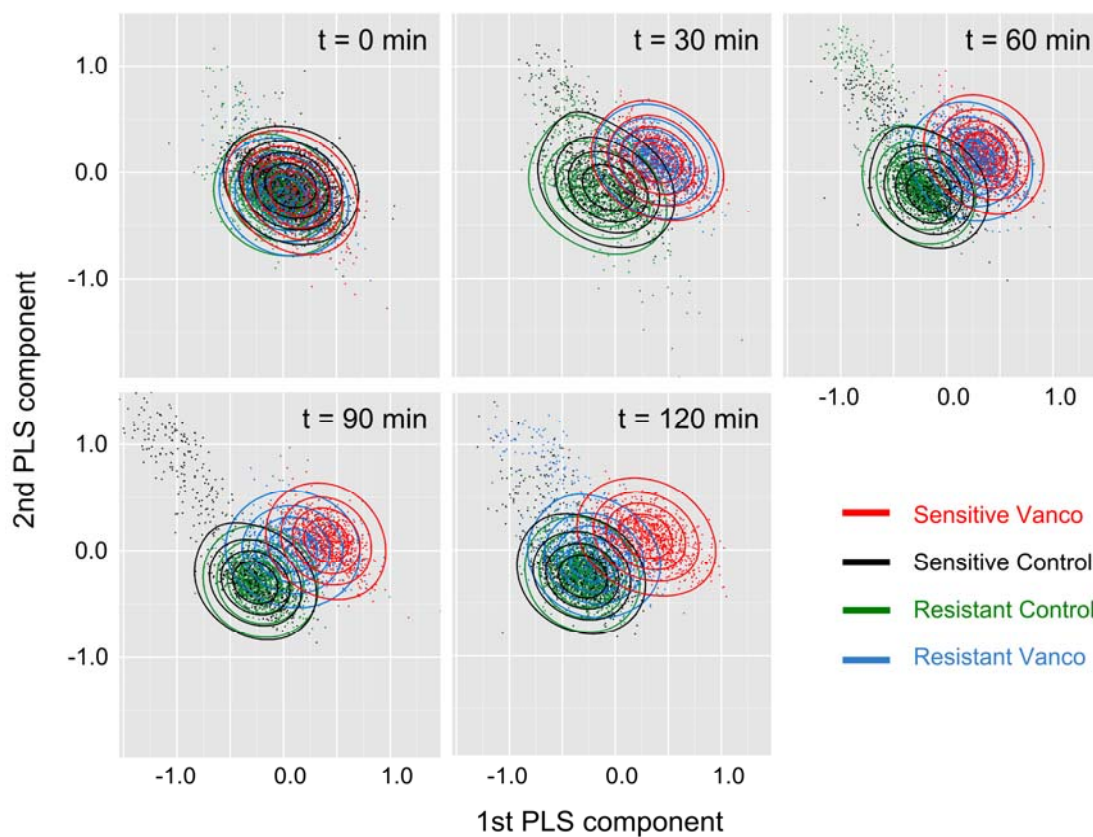

**Supplementary Figure S3: PLS score plot for *E. faecalis*** | The first level of the presented chemometric model consists of a PLS data regularization. The scores of the first and second PLS component are plotted at 0, 30, 60, 90 and 120 min after antibiotic vancomycin addition and contour lines of a smoothed 2D-density estimation are shown as guides. At  $t = 0$  the scores are nearly identical. At  $t = 30$  min the separation of treated and control samples is observed. At  $t = 60$  min the scores of the resistant *E. faecalis* strain start moving towards the scores of the untreated control samples and consolidate at later time points. immediately separates from the sensitive one and behaves like the control samples. (d) The 60 min and 120 min scores in figure (c) are paired to include time dependency in the model.
